# Supplementary material for: Rhodium-mediated delamination of layered copper and zinc vinylphosphonates
Source: Royal Society of Chemistry journal article supplement (doi:10.1039/b110356n), 2002-01-01

Rhodium-mediated Delamination of Layered Copper and Zinc Vinylphosphonates

**Vinny Kim,<sup>a</sup> Raymond J. Butcher,<sup>b</sup> Brandy A. Harper,<sup>c</sup> Terence L. Schull<sup>a†</sup> and**

**D. Andrew Knight<sup>c\*</sup>**

*<sup>a</sup>Department of Chemistry,  
The George Washington University, 725 21st Street, N.W.  
Washington, District of Columbia 20052, USA*

*<sup>b</sup>Department of Chemistry  
Howard University,  
Washington, District of Columbia 20009, USA*

*<sup>c</sup>Department of Chemistry,  
Loyola University, 6363 St. Charles Avenue  
New Orleans, Louisiana 70118, USA*

**Supporting Information**

Figure 1.  $^{31}\text{P}$  NMR of Reaction of Compound 2 with  $\text{RhCl}_3$  in  $\text{H}_2\text{O}$ .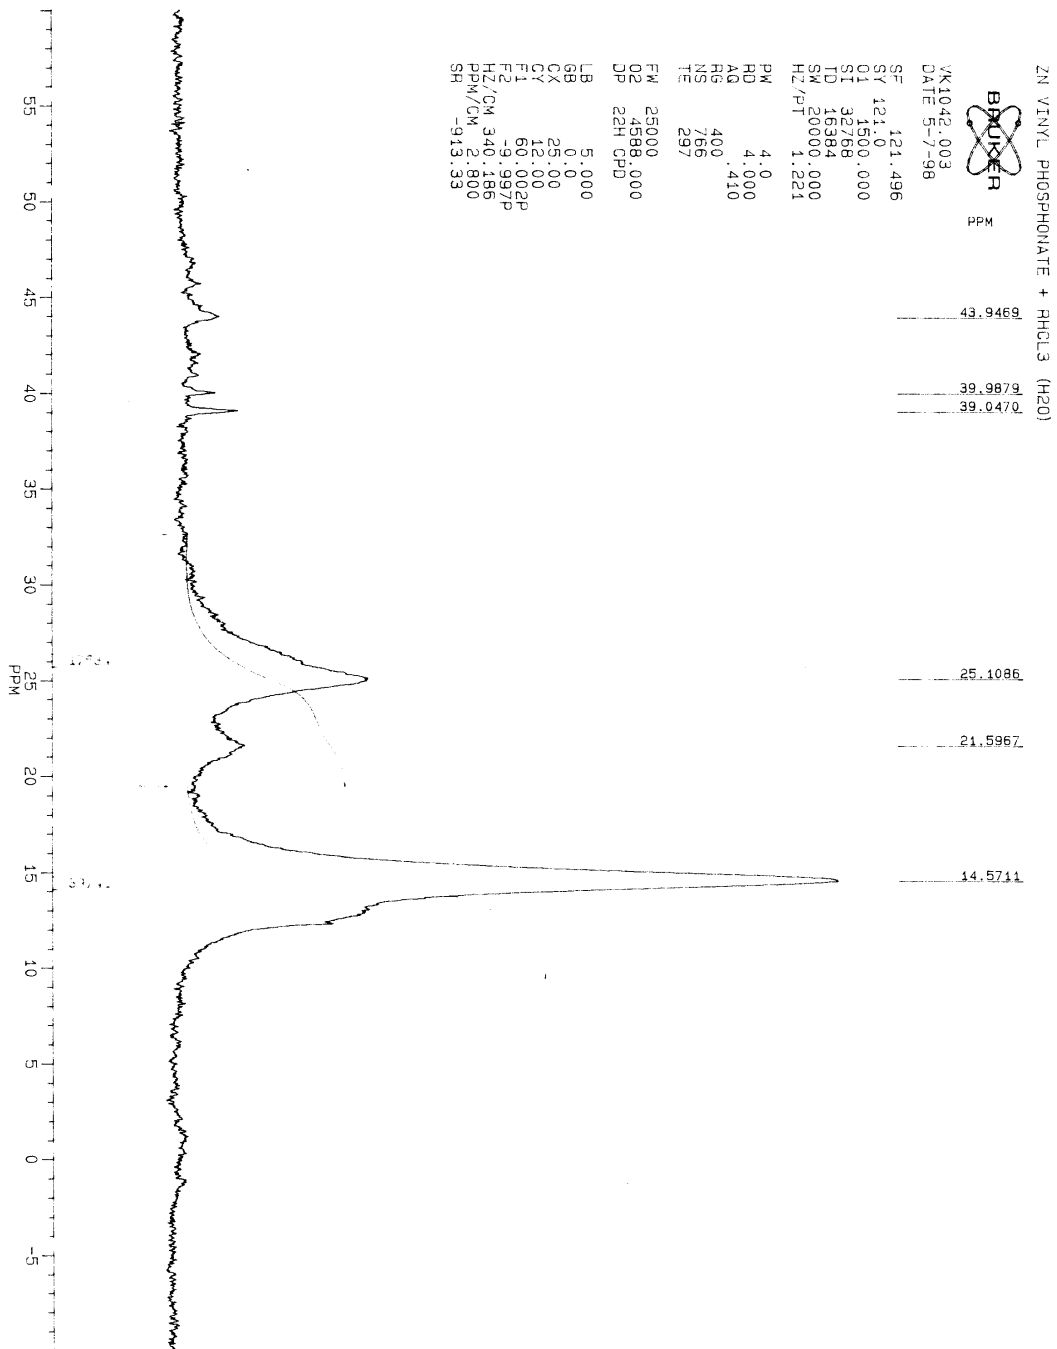

Supplement: b110356n.pdf [file b110356n.pdf]
